# Supplementary material
Source: MDPI journal article supplement (https://www.mdpi.com/2075-163X/12/9/1078)
Supplement: s1 [file s1]

Archive with 4 entries (4 files):
- Edge_experiment_IdP.xlsm
- Electronic supplement.pdf
- IdP_isotherms_paper.xlsm
- Result_isotherm_BC.xlsm
