# Supplementary material
Source: MDPI journal article supplement (https://www.mdpi.com/2075-163X/12/9/1078)
Supplement: s1 [file s1 › Edge_experiment_IdP.xlsm]

## Sheet: IdP
Sample	pHeq	m(clay)	total Volume	S/L	Snini	Aini	CPMini	CPMsusp	2s	Sn0 (susp)	A0 (susp)	CPMeq	2s	Sneq	Aeq	Kd	2s Kd	log Kd/ %sorption	2s+ logKd	2s- log Kd
		g	mL	g/L	mol/L	Bq/mL	CPM/mL	CPM/mL	CPM/mL	mol/L	Bq/mL		CPM/mL	mol/L	Bq/mL	L/kg	L/kg		L/kg	L/kg
Sn_IdP_1	3.05	0.0130499	20.184	0.646546	6.32039e-08	111.039	2331.81	2022.53	41.2595	5.48206e-08	96.3108	92.0069	4.96837	2.49385e-09	4.38128	32453	2970.71	4.51125	0.0380393	0.0416937
Sn_IdP_2	3.43	0.0130758	20.129	0.649599	6.48076e-08	113.856	2390.98	1962.8	40.0412	5.32019e-08	93.4669	46.2001	3.51121	1.25225e-09	2.2	63862.3	6763.32	4.80524	0.0437177	0.0486162
Sn_IdP_3	4.06	0.0129981	20.191	0.643757	6.4201e-08	112.791	2368.6	1904.73	38.8565	5.16277e-08	90.7014	26.3857	2.64913	7.15186e-10	1.25646	110582	13771.8	5.04368	0.0509747	0.0577634
Sn_IdP_4	4.51	0.013024	20.091	0.64825	6.49302e-08	114.072	2395.5	1897.55	38.71	5.14331e-08	90.3595	30.9884	2.86953	8.39942e-10	1.47564	92918.1	10997.1	4.9681	0.0485786	0.0547048
Sn_IdP_5	5	0.0131017	20.172	0.649498	6.50775e-08	114.33	2400.94	1890.38	38.5637	5.12387e-08	90.0179	25.4782	2.60387	6.90587e-10	1.21325	112696	14199	5.05191	0.0515359	0.0584854
Sn_IdP_6	5.53	0.0131276	20.141	0.651783	6.76295e-08	118.814	2495.09	1855.44	37.851	5.02918e-08	88.3544	18.9231	2.24807	5.12911e-10	0.9011	148902	20814.2	5.1729	0.0568228	0.0653928
Sn_IdP_7	6.02	0.0131535	20.079	0.655085	6.80433e-08	119.541	2510.36	1897.51	38.7092	5.1432e-08	90.3575	31.2235	2.87881	8.46313e-10	1.48683	91242.8	10770.3	4.9602	0.0484573	0.0545511
Sn_IdP_8	6.52	0.013024	20.238	0.643542	6.79154e-08	119.316	2505.64	1925.3	39.2762	5.21854e-08	91.6812	43.3012	3.41213	1.17368e-09	2.06196	67537.4	7289.11	4.82954	0.0445112	0.0495997
Sn_IdP_9	7.08	0.0129463	20	0.647316	6.81063e-08	119.651	2512.68	1910.52	38.9745	5.17846e-08	90.977	20.7585	2.35401	5.62659e-10	0.988499	140635	19017.8	5.14809	0.0550829	0.0630981
Sn_IdP_10	7.44	0.0133606	20.081	0.665335	6.90611e-08	121.329	2547.91	2193.01	44.2989	5.94417e-08	104.429	15.6849	2.04845	4.25141e-10	0.746902	208641	31276.2	5.3194	0.0606616	0.070532
Sn_IdP_11	7.98	0.0131794	20.051	0.657291	6.8754e-08	120.789	2536.58	2116.33	42.7498	5.73631e-08	100.778	43.8402	3.41953	1.18829e-09	2.08763	71922	7716.87	4.85686	0.0442633	0.049292
Sn_IdP_12	8.48	0.0129463	19.995	0.647478	6.91524e-08	121.489	2551.27	2185.06	44.1383	5.92262e-08	104.051	74.7305	4.46888	2.02557e-09	3.5586	43614.2	4141.74	4.63963	0.0393995	0.0433337
Sn_IdP_13	8.96	0.0131276	20.111	0.652755	6.85489e-08	120.429	2529.01	2127.76	42.9807	5.76729e-08	101.322	21.8735	2.41921	5.92882e-10	1.04159	147491	19594.8	5.16877	0.054174	0.0619079
Sn_IdP_14	9.49	0.0130758	20.061	0.651801	6.913e-08	121.45	2550.45	2157.21	43.5756	5.84712e-08	102.724	29.3924	2.79816	7.96683e-10	1.39964	111067	13366.9	5.04558	0.0493538	0.0556902
Sn_IdP_15	9.94	0.0129463	20.128	0.643199	6.86954e-08	120.686	2534.42	2140.35	43.235	5.80142e-08	101.921	48.0597	3.57564	1.30266e-09	2.28856	67685.4	7087.7	4.8305	0.0432503	0.0480388
Sn_IdP_16	10.43	0.0128945	20.014	0.644276	6.92923e-08	121.735	2556.44	2196.59	44.3712	5.95388e-08	104.6	98.632	5.14859	2.67342e-09	4.69676	33014.8	2985.63	4.51871	0.0375991	0.0411654
Sn_IdP_17	10.95	0.0129981	20.007	0.649678	6.99336e-08	122.862	2580.1	2189.92	44.2363	5.93577e-08	104.282	238.804	7.97606	6.4728e-09	11.3716	12576	1025.26	4.09954	0.0340365	0.0369326
Sn_IdP_18	11.97	0.0130499	20.157	0.647412	6.90049e-08	121.23	2545.83	2154.73	43.5255	5.84039e-08	102.606	1095.72	22.5718	2.96994e-08	52.177	1492.87	129.87	3.17402	0.0362269	0.0395261
Blank 1	3.01	0	20.067		6.8084e-08	119.612	2511.86	759.452	15.7966	2.0585e-08	36.1644	378.876	10.0781	1.02694e-08	18.0417			50.112
Blank 2	6.96	0	20.132		6.90906e-08	121.381	2549	228.71	7.95912	6.1992e-09	10.891	86.4391	4.80601	2.34293e-09	4.11615			62.2058
Blank 3	11.97	0	20.25		6.8688e-08	120.673	2534.14	2178.46	44.0048	5.90471e-08	103.736	2073.26	41.8799	5.61958e-08	98.7268			4.82881
