# Supplementary material
Source: MDPI journal article supplement (https://www.mdpi.com/2075-163X/12/9/1078)
Supplement: s1 [file s1 › IdP_isotherms_paper.xlsm]

## Sheet: IdP_NaClO4_DOM
	Sample	pHeq	m(clay)	total Volume	S/L	DOM	Snini	Aini	CPMini	CPMsusp	2s	Sn0 (susp)	A0 (susp)	CPMeq	2s	Sneq	Aeq	Cs	Kd	2s Kd	log Kd/ %loss centri	2s+ logKd	2s- log Kd
			g	mL	g/L	ppmC	mol/L	Bq/mL	CPM/mL	CPM/mL	CPM/mL	mol/L	Bq/mL	CPM/mL	CPM/mL	mol/L	Bq/mL	(mol/kg)	L/kg	L/kg		L/kg	L/kg
	Sn_IdPOM_1	8.4	0.00207446	20.1219	0.103095	4.4456	2.09321e-09	3.67743	77.226	106.064	8.41508	2.87487e-09	5.05066	18.5022	6.48234	5.01502e-10	0.881056	2.30212e-05	45904.4	18215.8	4.66185	0.14514	0.219553
	Sn_IdPOM_2	8.37	0.00207446	20.1219	0.103095	4.35843	2.09321e-09	3.67743	77.226	103.709	8.35481	2.81104e-09	4.93854	15.2637	6.42599	4.13724e-10	0.726845	2.32536e-05	56205.5	25844.8	4.74978	0.164301	0.267467
	Sn_IdPOM_3	8.37	0.00207446	20.1219	0.103095	4.40201	1.88389e-09	3.30968	69.5034	101.302	8.28913	2.74578e-09	4.82389	19.7195	6.53299	5.34497e-10	0.939022	2.14491e-05	40129.5	15359.4	4.60346	0.140742	0.209535
	Sn_IdPOM_4	8.37	0.00207446	20.1219	0.103095	4.61994	4.81439e-09	8.45808	177.62	223.845	10.2344	6.06732e-09	10.6593	46.3582	7.09804	1.25654e-09	2.20754	4.66637e-05	37136.6	8167.34	4.5698	0.0863338	0.107865
	Sn_IdPOM_5	8.44	0.00207446	20.1219	0.103095	4.66352	5.23303e-09	9.19357	193.065	217.63	10.1612	5.89887e-09	10.3633	48.4488	7.15551	1.31321e-09	2.30709	4.448e-05	33871.3	7359.44	4.52983	0.0853893	0.106392
	Sn_IdPOM_6	8.38	0.00207446	20.1219	0.103095	4.75069	4.60507e-09	8.09034	169.897	212.556	10.0474	5.76133e-09	10.1217	44.7037	7.05698	1.21169e-09	2.12875	4.41306e-05	36420.6	8165.92	4.56135	0.0878565	0.110257
	Sn_IdPOM_7	8.42	0.00207446	20.1219	0.103095	4.48918	1.00474e-08	17.6516	370.685	382.179	10.7519	1.0359e-08	18.199	88.3785	7.91313	2.3955e-09	4.2085	7.72443e-05	32245.6	5592.68	4.50847	0.069461	0.0827258
	Sn_IdPOM_8	8.4	0.00207446	20.1219	0.103095	4.57635	8.16353e-09	14.342	301.181	329.278	10.1864	8.92508e-09	15.6799	85.5996	7.84416	2.32018e-09	4.07617	6.40663e-05	27612.6	4875.9	4.44111	0.0706222	0.0843796
	Sn_IdPOM_9	8.37	0.00207446	20.1219	0.103095	4.66352	9.00081e-09	15.8129	332.072	344.194	11.5449	9.32939e-09	16.3902	79.4329	7.70578	2.15303e-09	3.78252	6.96094e-05	32330.9	5797.91	4.50962	0.0716355	0.0858317
	Sn_IdPOM_10	8.35	0.00207446	20.1219	0.103095	4.75069	2.88863e-08	50.7485	1065.72	1017.18	22.1392	2.75708e-08	48.4373	259.458	10.5262	7.03261e-09	12.3551	0.000199217	28327.6	4267.28	4.45221	0.0609397	0.0709085
	Sn_IdPOM_11	8.36	0.00207446	20.1219	0.103095	4.57635	2.8677e-08	50.3807	1058	1025.6	21.8433	2.7799e-08	48.8383	255.332	10.4676	6.92077e-09	12.1587	0.000202515	29261.9	4405.79	4.4663	0.0609108	0.0708693
	Sn_IdPOM_12	8.4	0.00207446	20.1219	0.103095	4.4456	3.03516e-08	53.3227	1119.78	1092.01	23.6117	2.9599e-08	52.0005	296.894	11.006	8.04732e-09	14.1378	0.000209047	25977.2	3892.05	4.41459	0.0606319	0.0704919
	Sn_IdPOM_13	8.37	0.00939733	20.4676	0.459132	4.28482	5.80316e-08	101.952	2140.99	2096.94	43.5167	5.68377e-08	99.8544	107.724	8.22195	2.91985e-09	5.1297	0.000117434	40219.3	5517.68	4.60443	0.055833	0.0640848
	Sn_IdPOM_14	8.36	0.00999892	20.496	0.487847	4.49283	5.81567e-08	102.172	2145.61	2105.18	43.3561	5.70608e-08	100.246	118.389	8.40826	3.20893e-09	5.63755	0.000110387	34399.9	3531.37	4.53656	0.0424402	0.0470412
	Sn_IdPOM_15	8.39	0.00983296	20.4882	0.479934	4.36613	5.77678e-08	101.488	2131.26	2114.16	43.875	5.73042e-08	100.674	138.313	8.78206	3.74899e-09	6.58635	0.000111589	29765.1	2907.9	4.47371	0.0404817	0.0446467
	Sn_IdPOM_16	8.35	0.0092936	20.4627	0.454173	4.41442	9.736e-08	171.045	3591.96	3473.33	70.6581	9.41446e-08	165.396	206.965	9.83182	5.60978e-09	9.85546	0.000194936	34749.4	3055.91	4.54095	0.0366056	0.0399773
	Sn_IdPOM_17	8.35	0.00979147	20.4862	0.477954	4.32374	9.82763e-08	172.655	3625.76	3434.66	70.1749	9.30965e-08	163.555	220.046	9.97604	5.96435e-09	10.4784	0.000182302	30565.3	2654.36	4.48523	0.0361665	0.0394541
	Sn_IdPOM_18	8.35	0.00931435	20.4637	0.455165	4.41421	9.75612e-08	171.399	3599.38	3476.27	71.0158	9.42244e-08	165.537	209.089	9.81525	5.66737e-09	9.95664	0.00019456	34329.9	3009.52	4.53567	0.0364951	0.0398456
	Sn_IdPOM_19	8.33	0.00935584	20.4656	0.457148	4.45664	2.96154e-07	520.294	10926.2	10328.6	207.967	2.79956e-07	491.837	840.178	18.6065	2.2773e-08	40.0085	0.000562582	24703.8	1909.51	4.39276	0.0323351	0.0349376
	Sn_IdPOM_20	8.35	0.00941807	20.4686	0.460123	4.41315	2.97141e-07	522.027	10962.6	10352.3	208.442	2.80598e-07	492.965	876.387	19.3091	2.37545e-08	41.7327	0.000558206	23499	1816.19	4.37105	0.0323319	0.0349339
	Sn_IdPOM_21	8.33	0.00862977	20.4314	0.422379	4.46412	2.9727e-07	522.253	10967.3	10511.3	211.358	2.84908e-07	500.536	861	19.0148	2.33374e-08	41	0.000619279	26535.9	2050.54	4.42383	0.0323263	0.0349273
	Blank 1	8.36	0	20.024	0	4.42354	2.88172e-08	50.6271	1063.17	969.302	21.063	2.62729e-08	46.1572	981.89	21.6381	2.66141e-08	46.7566				-1.29865
	Blank 2	8.4	0	20.024	0	4.51114	2.86069e-08	50.2576	1055.41	1061.34	23.0067	2.87677e-08	50.5401	1018.15	22.0858	2.75969e-08	48.4831				4.07
	Blank 3	8.38	0	20.024	0	4.59873	2.86069e-08	50.2576	1055.41	1060.79	23.0062	2.87529e-08	50.514	1039.89	22.5328	2.81863e-08	49.5187				1.97051

## Sheet: IdP_NaHCO3
	Sample	pHeq	m(clay)		S/L	Snini	Aini	CPMini	CPMsusp	2s	Sn0 (susp)	A0 (susp)	CPMeq	2s	Sneq	Aeq	Cs	Kd	2s Kd	log Kd/ %loss centri	2s+ logKd	2s- log Kd
			g	mL	g/L	mol/L	Bq/mL	CPM/mL	CPM/mL	CPM/mL	mol/L	Bq/mL	CPM/mL	CPM/mL	mol/L	Bq/mL	(mol/kg)	L/kg	L/kg		L/kg	L/kg
	Sn_IdPCarb_1	8.53	0.00190851	19.9391	0.0957169	1.68992e-09	2.96892	62.3473	131.61	8.65867	3.5673e-09	6.26716	14.528	6.3274	3.93782e-10	0.69181	3.31553e-05	84197	37942.6	4.9253	0.16156	0.260143
	Sn_IdPCarb_2	8.56	0.00188776	19.9281	0.0947286	3.08162e-09	5.41389	113.692	129.694	8.63676	3.51535e-09	6.17589	15.6894	6.37094	4.2526e-10	0.747112	3.26205e-05	76707.1	32431.1	4.88484	0.153141	0.238668
	Sn_IdPCarb_3	8.59	0.00174255	19.8963	0.0875818	1.90526e-09	3.34722	70.2917	120.28	8.2961	3.26018e-09	5.7276	9.78237	6.21952	2.65152e-10	0.465827	3.41969e-05	128971	83386.9	5.11049	0.216576	0.451677
	Sn_IdPCarb_4	8.6	0.00192925	19.8461	0.0972108	5.518e-09	9.69421	203.578	225.847	10.1058	6.1216e-09	10.7546	29.1637	6.62773	7.90484e-10	1.38875	5.48407e-05	69376.1	17053.3	4.84121	0.0954516	0.122519
	Sn_IdPCarb_5	8.6	0.0017633	19.8592	0.0887897	5.93852e-09	10.433	219.093	178.958	9.45675	4.85065e-09	8.5218	25.7822	6.62175	6.98828e-10	1.22772	4.67602e-05	66912.4	18524.5	4.82551	0.106139	0.14077
	Sn_IdPCarb_6	8.58	0.00188776	19.8191	0.0952496	5.10046e-09	8.96067	188.174	228.578	10.121	6.19561e-09	10.8847	27.4232	6.63953	7.43307e-10	1.30587	5.72422e-05	77010.2	19969.3	4.88655	0.100132	0.130362
	Sn_IdPCarb_7	8.51	0.00188776	19.8501	0.0951009	8.69969e-09	15.2839	320.962	363.379	11.9517	9.8494e-09	17.3038	46.7544	6.92034	1.26728e-09	2.2264	9.02423e-05	71209.5	12086.9	4.85254	0.0680885	0.0807847
	Sn_IdPCarb_8	8.56	0.00141064	19.7996	0.0712457	8.93461e-09	15.6966	329.629	376.006	11.9943	1.01917e-08	17.9051	66.1373	7.47741	1.79265e-09	3.1494	0.000117888	65761.6	9268.16	4.81797	0.0572612	0.0659744
	Sn_IdPCarb_9	8.7	0.00197074	19.817	0.0994469	9.13929e-09	16.0562	337.181	338.199	11.5528	9.16689e-09	16.1047	55.8028	7.22521	1.51254e-09	2.65728	7.69692e-05	50887.5	7898.65	4.70661	0.0626639	0.0732553
	Sn_IdPCarb_10	8.58	0.00184627	19.8012	0.0932407	2.97797e-08	52.318	1098.68	1099.7	23.6918	2.98073e-08	52.3665	207.455	9.6299	5.62308e-09	9.87881	0.000259374	46126.7	4119.58	4.66395	0.0371515	0.0406295
	Sn_IdPCarb_11	8.84	0.00188776	19.8651	0.0950291	2.94718e-08	51.7771	1087.32	1114.24	23.9748	3.02016e-08	53.0592	189.053	9.51663	5.12428e-09	9.00252	0.000263891	51498.1	4694.89	4.71179	0.0378909	0.0415155
	Sn_IdPCarb_12	8.64	0.00168032	19.7993	0.0848674	2.99952e-08	52.6966	1106.63	1133.18	24.3553	3.07149e-08	53.961	202.503	9.64213	5.48886e-09	9.64301	0.000297241	54153.5	4861.57	4.73363	0.0373364	0.0408507
	Sn_IdPCarb_13	8.58	0.0100819	19.8089	0.508958	5.9536e-08	104.595	2196.49	2212.31	45.7495	5.99648e-08	105.348	69.8458	7.45153	1.89317e-09	3.32599	0.000114099	60268.8	7823.31	4.78009	0.0530043	0.0603844
	Sn_IdPCarb_14	8.58	0.0102893	19.8067	0.519488	5.86921e-08	103.112	2165.36	2236.73	46.2402	6.06265e-08	106.511	70.2029	7.47023	1.90285e-09	3.343	0.000113041	59406.3	7697.72	4.77383	0.052916	0.0602699
	Sn_IdPCarb_15	9.18	0.0102686	19.8477	0.517369	5.92074e-08	104.018	2184.37	2191.96	45.3341	5.94131e-08	104.379	75.5957	7.58496	2.04902e-09	3.5998	0.000110877	54111.9	6745.34	4.73329	0.0510195	0.057821
	Sn_IdPCarb_16	8.9	0.0102686	19.7687	0.519437	1.0163e-07	178.547	3749.49	3590.63	73.2411	9.73242e-08	170.983	145.601	8.79497	3.94653e-09	6.9334	0.000179767	45550.7	4346.98	4.6585	0.0395853	0.0435586
	Sn_IdPCarb_17	8.61	0.0103723	19.8486	0.522571	1.01433e-07	178.201	3742.23	3661.58	74.6446	9.92471e-08	174.361	111.321	8.25401	3.01735e-09	5.30099	0.000184147	61029.2	6384.81	4.78554	0.0432125	0.0479921
	Sn_IdPCarb_18	8.63	0.0103931	19.8876	0.52259	1.01658e-07	178.596	3750.52	3704.55	75.511	1.00412e-07	176.407	107.908	8.17227	2.92484e-09	5.13847	0.000186546	63779.8	6744.26	4.80468	0.0436542	0.0485376
	Sn_IdPCarb_19	8.58	0.0104346	19.8596	0.525417	3.01799e-07	530.211	11134.4	10781.4	216.97	2.9223e-07	513.399	531.723	13.5541	1.44124e-08	25.3201	0.000528756	36687.7	2865.31	4.56452	0.0326591	0.0353163
	Sn_IdPCarb_20	8.72	0.00999892	19.907	0.502282	3.01926e-07	530.434	11139.1	10923.9	219.824	2.96092e-07	520.184	593.033	14.1962	1.60742e-08	28.2397	0.000557491	34682.4	2692.68	4.54011	0.032473	0.0350987
	Sn_IdPCarb_21	8.87	0.0105175	19.9645	0.526812	2.97048e-07	521.865	10959.2	11743.3	236.312	3.18302e-07	559.203	672.687	15.3432	1.82332e-08	32.0327	0.000569592	31239.3	2415.31	4.4947	0.0323432	0.0349472
	Blank 1	8.51	0	19.838	0	2.90874e-08	51.1018	1073.14	1132.83	24.335	3.07053e-08	53.9442	1105.35	23.7824	2.99604e-08	52.6355				2.42589
	Blank 2	8.55	0	19.83	0	2.93116e-08	51.4956	1081.41	1165.04	24.9713	3.15786e-08	55.4783	1133.43	24.3393	3.07217e-08	53.973				2.71335
	Blank 3	8.55	0	19.778	0	2.83238e-08	49.7603	1044.97	1115.88	24.0047	3.0246e-08	53.1372	1102.21	23.7171	2.98754e-08	52.486				1.22541

## Sheet: IdP_NaClO4
	Sample	pHeq	m(clay)	total Volume	S/L	Snini	Aini	CPMini	CPMsusp	2s	Sn0 (susp)	A0 (susp)	CPMeq	2s	Sneq	Aeq	Cs	Kd	2s Kd	log Kd/ %loss centri	2s+ logKd	2s- log Kd
			g	mL	g/L	mol/L	Bq/mL	CPM/mL	CPM/mL	CPM/mL	mol/L	Bq/mL	CPM/mL	CPM/mL	mol/L	Bq/mL	(mol/kg)	L/kg	L/kg		L/kg	L/kg
	Sn_IdPC_2	8.64	0.00209521	19.9715	0.10491	3.29224e-09	5.78392	121.462	66.8701	7.11203	1.81252e-09	3.18429	2.31825	6.04662	6.28361e-11	0.110393	1.66779e-05	265419	693603	5.42393	0.557896	#NUM!
	Sn_IdPC_3	8.63	0.00209521	19.9415	0.105068	3.29719e-09	5.79262	121.645	67.7635	7.12117	1.83673e-09	3.22683	3.41941	6.0943	9.26833e-11	0.162829	1.65992e-05	179096	320512	5.25309	0.445543	#NUM!
	Sn_IdPC_4	8.68	0.00207446	19.9359	0.104057	1.58344e-09	2.78184	58.4186	136.622	8.37711	3.70315e-09	6.50582	9.29151	6.21343	2.51847e-10	0.442453	3.31675e-05	131697	89214.3	5.11958	0.224642	0.491362
	Sn_IdPC_6	8.55	0.00205372	20.0319	0.102522	3.37682e-09	5.93251	124.583	137.585	8.36669	3.72926e-09	6.55168	9.14573	6.21219	2.47895e-10	0.435511	3.39571e-05	136982	94204.7	5.13666	0.2273	0.505452
	Sn_IdPC_7	8.58	0.00209521	20.0079	0.104719	6.08557e-09	10.6913	224.518	206.842	9.34386	5.60645e-09	9.84961	16.3153	6.33918	4.42226e-10	0.776918	4.9315e-05	111515	44533.3	5.04733	0.145925	0.221376
	Sn_IdPC_8	8.56	0.00207446	20.0409	0.103511	8.32575e-09	14.627	307.166	219.119	9.60933	5.93922e-09	10.4342	14.713	6.31773	3.98797e-10	0.700619	5.35247e-05	134216	58894.1	5.1278	0.158001	0.250884
	Sn_IdPC_9	8.62	0.00207446	20.0209	0.103615	8.33407e-09	14.6416	307.473	225.101	9.66352	6.10137e-09	10.7191	15.1974	6.30412	4.11926e-10	0.723685	5.49095e-05	133300	56568.9	5.12483	0.153624	0.23986
	Sn_IdPC_10	8.6	0.00203298	19.911	0.102103	2.85376e-08	50.1359	1052.85	654.083	14.8121	1.77289e-08	31.1468	59.397	7.21069	1.60996e-09	2.82843	0.000157869	98058.1	14041.5	4.99148	0.0581205	0.0671183
	Sn_IdPC_11	8.57	0.00209521	19.9899	0.104813	2.97785e-08	52.3159	1098.63	697.811	15.6514	1.89142e-08	33.2291	54.4384	7.1163	1.47555e-09	2.59231	0.000166378	112756	17026.7	5.05214	0.0610771	0.0710947
	Sn_IdPC_12	8.5	0.00209521	20.0709	0.10439	3.07817e-08	54.0784	1135.65	610.557	14.0977	1.65492e-08	29.0741	78.6056	7.56533	2.13061e-09	3.74312	0.000138122	64827.3	7983.91	4.81176	0.0504403	0.057078
	Sn_IdPC_13	8.52	0.0103101	19.8997	0.518103	6.09601e-08	107.097	2249.03	1239.12	26.2737	3.35863e-08	59.0055	26.0982	6.56995	7.07393e-10	1.24277	6.34601e-05	89709.9	23542.8	4.95284	0.101208	0.132199
	Sn_IdPC_14	8.52	0.0104138	19.9886	0.520988	6.27194e-08	110.188	2313.94	1260.86	26.6982	3.41757e-08	60.0411	23.4513	6.47101	6.35647e-10	1.11673	6.43778e-05	101279	28936.9	5.00552	0.109144	0.146128
	Sn_IdPC_15	8.53	0.010476	19.9845	0.524208	6.22809e-08	109.417	2297.76	1260.7	26.6932	3.41713e-08	60.0333	17.8463	6.37877	4.83725e-10	0.849825	6.42637e-05	132852	48493.9	5.12337	0.13514	0.197242
	Sn_IdPC_16	8.53	0.0103931	19.8816	0.522748	1.05019e-07	184.501	3874.53	2113.37	43.6295	5.7283e-08	100.637	47.5448	6.98586	1.2887e-09	2.26404	0.000107115	83118.7	13669.5	4.9197	0.0661239	0.0780318
	Sn_IdPC_17	8.53	0.0103931	19.9276	0.521541	1.05908e-07	186.063	3907.33	2058.83	42.5356	5.58046e-08	98.0395	37.6374	6.80406	1.02016e-09	1.79226	0.000105043	102967	20107.7	5.0127	0.0774706	0.0943567
	Sn_IdPC_18	8.53	0.0104346	19.9596	0.522785	1.06191e-07	186.559	3917.75	2060.63	42.584	5.58536e-08	98.1254	41.4144	6.86698	1.12254e-09	1.97211	0.000104691	93263	16929.2	4.96971	0.0724413	0.0869922
	Sn_IdPC_19	8.46	0.0104346	20.9836	0.497273	3.08398e-07	541.805	11377.9	6069.87	122.644	1.64524e-07	289.042	212.188	9.70672	5.75135e-09	10.1042	0.000319287	55515.1	4818.57	4.74441	0.0361486	0.0394329
	Sn_IdPC_20	8.51	0.0103931	20.9786	0.495413	3.09976e-07	544.576	11436.1	5872.77	118.702	1.59182e-07	279.656	184.505	9.28745	5.00102e-09	8.78596	0.000311217	62230.7	5556.32	4.794	0.0371419	0.0406179
	Sn_IdPC_21	8.54	0.0103516	20.9106	0.495039	3.10336e-07	545.21	11449.4	6034.37	121.931	1.63562e-07	287.351	212.733	9.67202	5.76614e-09	10.1301	0.000318754	55280.4	4790.15	4.74257	0.0360904	0.0393637
	Blank 1	8.46	0	19.975	0	2.88977e-08	50.7684	1066.14	737.787	16.4319	1.99977e-08	35.1327	690.564	15.712	1.87178e-08	32.884				6.40057
	Blank 2	8.39	0	19.842	0	2.90914e-08	51.1087	1073.28	689.851	15.4997	1.86984e-08	32.8501	669.578	15.3058	1.81489e-08	31.8847				2.93874
	Blank 3	8.48	0	20.011	0	2.9071e-08	51.073	1072.53	707.117	15.8422	1.91664e-08	33.6723	680.239	15.5807	1.84379e-08	32.3923				3.80113
	Sn_IdPC_1	8.47	0.0106439	20.0424	0.531071	9.46938e-08	166.361		4318.9	129.943	1.41284e-07	248.213	165.853	19.2289	5.42554e-09	9.53178	0.00025582	47151	6574.53	4.67349	0.0566898	0.0652167
	Sn_IdPC_2	8.49	0.0106439	19.9854	0.532586	9.74629e-08	171.226		4535.88	135.833	1.48382e-07	260.683	101.827	19.8915	3.33107e-09	5.85214	0.000272353	81761.4	17173.5	4.91255	0.0828012	0.102397
	Sn_IdPC_3	8.48	0.0106877	20.0003	0.534378	2.94667e-07	517.681		12933.8	276.495	4.23104e-07	743.324	760.539	28.2154	2.48795e-08	43.7091	0.000745213	29952.9	2487.64	4.47644	0.0346493	0.0376552
	Sn_IdPC_4	8.53	0.0105344	19.9905	0.526972	3.02308e-07	531.104		12696.2	271.68	4.15332e-07	729.669	505.7	26.3853	1.65429e-08	29.0632	0.000756756	45745	4148.36	4.66034	0.0376991	0.0412854
