# Supplementary material
Source: MDPI journal article supplement (https://www.mdpi.com/2075-163X/12/9/1078)
Supplement: s1 [file s1 › Result_isotherm_BC.xlsm]

## Sheet: BC_Spring
	Sample	pHeq	m(clay)	total Volume	S/L	Snini	Aini	CPMini	CPM0 (susp)	2s	Sn0 (susp)	A0 (susp)	CPMeq	2s	Sneq	Aeq	Cs	Kd	2s Kd	log Kd	2s+ logKd	2s- log Kd
			g	mL	g/L	mol/L	Bq/mL	CPM/mL	CPM/mL	CPM/mL	mol/L	Bq/mL	CPM/mL	CPM/mL	mol/L	Bq/mL	(mol/kg)	L/kg	L/kg	or % loss centrifugation	L/kg	L/kg
	Sn_BC_1	8.41	0.00254161	19.9085	0.127665	0	0	0	204.459	28.692	4.77782e-09	11.7505	130.108	13.3696	3.04038e-09	7.4775	1.36093e-05	4476.19	1985.79	3.65091	0.159457	0.25464
	Sn_BC_2	8.4	0.00247677	20.0035	0.123817	9.98165e-10	2.45488	42.7149	215.14	29.5278	5.02741e-09	12.3644	128.186	14.2397	2.99547e-09	7.36702	1.64108e-05	5478.56	2187.81	3.73867	0.145923	0.221372
	Sn_BC_3	8.41	0.00258051	20.0954	0.128413	9.936e-10	2.44365	42.5195	211.147	30.6491	4.9341e-09	12.1349	124.799	14.2929	2.9163e-09	7.17233	1.57134e-05	5388.11	2231.37	3.73144	0.150489	0.232197
	Sn_BC_4	8.37	0.00258051	20.0314	0.128823	1.99355e-09	4.90292	85.3108	354.732	31.5998	8.28941e-09	20.3869	206.34	16.6211	4.82178e-09	11.8586	2.69178e-05	5582.54	1470.46	3.74683	0.101542	0.13277
	Sn_BC_5	8.41	0.00259348	20.1094	0.128969	3.97164e-09	9.76781	169.96	319.798	35.334	7.47307e-09	18.3792	228.486	13.928	5.33928e-09	13.1314	1.6545e-05	3098.74	1320.94	3.49118	0.154206	0.241303
	Sn_BC_6	8.4	0.00259348	20.0294	0.129484	4.48594e-09	11.0327	191.969	343.913	31.0041	8.03658e-09	19.7651	323.155	11.8759	7.55151e-09	18.5721	3.74621e-06	496.088	794.44	2.69556	0.415209	2.69556
	Sn_BC_7	8.4	0.00259348	20.2114	0.128318	9.38503e-09	23.0815	401.618	577.122	35.184	1.34862e-08	33.1679	413.211	17.0622	9.65594e-09	23.7478	2.98499e-05	3091.35	779.713	3.49015	0.0976819	0.126228
	Sn_BC_8	8.45	0.00215259	19.9398	0.107954	1.10149e-08	27.0899	471.364	618.182	35.6772	1.44457e-08	35.5277	342.855	20.5868	8.01186e-09	19.7043	5.9598e-05	7438.72	1309.46	3.8715	0.0704196	0.0840903
	Sn_BC_9	8.41	0.00260645	19.9664	0.130542	1.15002e-08	28.2836	492.135	616.063	35.5845	1.43962e-08	35.4059	372.135	19.5095	8.69608e-09	21.3871	4.36652e-05	5021.25	945.098	3.70081	0.0748967	0.0905614
	Sn_BC_10	8.44	0.00259348	19.8704	0.13052	2.46189e-08	60.5474	1053.53	1221.01	44.265	2.85325e-08	70.1727	779.45	27.3606	1.82142e-08	44.796	7.90555e-05	4340.31	615.672	3.63752	0.057609	0.0664367
	Sn_BC_11	8.39	0.00259348	19.9544	0.12997	2.65165e-08	65.2144	1134.73	1222.64	43.9188	2.85708e-08	70.2669	857.324	27.0754	2.0034e-08	49.2715	6.56828e-05	3278.56	528.075	3.51568	0.064858	0.0762738
	Sn_BC_12	8.41	0.00260645	20.0924	0.129723	2.7825e-08	68.4326	1190.73	1183.27	43.4525	2.76508e-08	68.0042	789.51	26.4828	1.84493e-08	45.3741	7.09316e-05	3844.67	580.865	3.58486	0.0611067	0.0711348
	Sn_BC_13	8.44	0.00255458	19.8894	0.128439	5.57159e-08	137.027	2384.27	2401.29	56.7498	5.61136e-08	138.005	1742.41	50.2403	4.07168e-08	100.139	0.000119877	2944.15	406.507	3.46896	0.0561699	0.0645293
	Sn_BC_14	8.4	0.00252864	19.9225	0.126924	5.56235e-08	136.8	2380.32	2445.4	57.6213	5.71442e-08	140.54	1724.35	51.1712	4.02948e-08	99.1007	0.000132752	3294.52	433.368	3.51779	0.0536707	0.0612512
	Sn_BC_15	8.37	0.00261942	20.0044	0.130942	5.58948e-08	137.467	2391.93	2415.32	57.0349	5.64413e-08	138.811	1760.53	50.5007	4.11402e-08	101.18	0.000116854	2840.37	395.194	3.45338	0.0565751	0.0650648
	Sn_BC_16	8.43	0.00260645	19.8724	0.131159	6.53088e-08	160.62	2794.79	4497.55	96.5255	1.05099e-07	258.48	3377.6	91.9178	7.8928e-08	194.115	0.000199536	2528.08	356.673	3.40279	0.0573179	0.0660497
	Sn_BC_17	8.4	0.00258051	20.0294	0.128836	6.97812e-08	171.619	2986.18	4509.01	96.8371	1.05367e-07	259.138	3261.71	92.2223	7.622e-08	187.455	0.000226232	2968.14	390.329	3.47248	0.0536569	0.0612333
	Sn_BC_18	8.43	0.00252864	20.0445	0.126152	6.47482e-08	159.241	2770.8	4792.67	102.918	1.11996e-07	275.441	3268.72	98.0173	7.63837e-08	187.858	0.000282294	3695.73	446.507	3.5677	0.0495347	0.0559207
	Sn_BC_19	8.43	0.00265832	19.8783	0.133729	2.61157e-07	642.288	11175.8	13458.6	274.772	3.14502e-07	773.483	10199.6	271	2.38346e-07	586.187	0.000569475	2389.28	335.601	3.37827	0.0570806	0.0657346
	Sn_BC_20	8.39	0.00261942	19.8464	0.131985	2.61578e-07	643.322	11193.8	13173.1	269.086	3.07831e-07	757.076	9992.41	265.295	2.33503e-07	574.276	0.000563151	2411.75	339.523	3.38233	0.0572015	0.0658951
	Sn_BC_21	8.42	0.00256755	19.9124	0.128942	2.55696e-07	628.858	10942.1	13311.1	271.876	3.11054e-07	765.003	9968.55	268.073	2.32946e-07	572.905	0.000605761	2600.44	356.283	3.41505	0.0557638	0.0639937
	Sn_BC_22	8.44	0.00259348	19.9164	0.130218	5.51392e-07	1356.09	23595.9	26121.7	527.84	6.10414e-07	1501.25	20486.1	524.178	4.7872e-07	1177.36	0.00101134	2112.59	320.933	3.32482	0.0614202	0.0715603
	Sn_BC_23	8.43	0.00263238	19.9244	0.132119	5.61193e-07	1380.19	24015.4	25904.3	523.429	6.05333e-07	1488.75	20697.6	519.793	4.83662e-07	1189.52	0.000920915	1904.04	305.262	3.27968	0.0645789	0.0758877
	Sn_BC_24	8.44	0.00259348	19.7824	0.1311	5.60173e-07	1377.69	23971.7	26589.4	537.166	6.21342e-07	1528.12	20513.7	533.564	4.79366e-07	1178.95	0.00108296	2259.15	328.982	3.35395	0.0590413	0.0683499
	BC_Blank1	8.44	0	19.828		2.6182e-08	64.3918	1120.42	1050.81	41.6084	2.45553e-08	60.3912	1202.65	22.5028	2.81036e-08	69.1179				-14.4503
	BC_Blank2	8.41	0	19.837		2.51636e-08	61.8871	1076.84	1214.87	43.5867	2.83892e-08	69.8203	1201.32	26.0259	2.80725e-08	69.0412				1.1158
	BC_Blank3	8.38	0	19.837		2.36538e-08	58.1739	1012.23	1211.57	43.4044	2.83121e-08	69.6306	1214.12	25.9338	2.83717e-08	69.7772				-0.210598
